# Supplementary material for: Differential and Overlapping Effects of Melatonin and Its Metabolites on Keratinocyte Function: Bioinformatics and Metabolic Analyses
Source: MDPI journal article supplement (doi:10.3390/antiox10040618), 2021-04-17

## Supplementary Material

### • Supplementary Tables

**Supplementary Table 1.** Summary of Ingenuity Pathway Analysis (IPA) for top biological functions regulated by melatonin and its metabolites based on the data obtained from primary human epidermal keratinocytes. (0 – lack of activation, Z – score in IPA)

| Compound         | Categories                                                                                                                                     | Diseases or Functions Annotation | P-value                | Activation Z-score | # Molecules |
|------------------|------------------------------------------------------------------------------------------------------------------------------------------------|----------------------------------|------------------------|--------------------|-------------|
| <b>Melatonin</b> | Cancer, Dermatological Diseases and Conditions, Organismal Injury and Abnormalities                                                            | Cutaneous melanoma               | $4.3 \times 10^{-21}$  | 0                  | 1016        |
|                  | Cancer, Dermatological Diseases and Conditions, Organismal Injury and Abnormalities                                                            | Skin tumor                       | $4.64 \times 10^{-18}$ | 1.29               | 1052        |
|                  | Dermatological Diseases and Conditions, Organismal Injury and Abnormalities                                                                    | Skin lesion                      | $5.6 \times 10^{-18}$  | -0.14              | 1058        |
|                  | Cancer, Dermatological Diseases and Conditions, Organismal Injury and Abnormalities                                                            | Skin cancer                      | $5.93 \times 10^{-18}$ | 0.39               | 1046        |
|                  | Organismal Injury and Abnormalities, Reproductive System Disease                                                                               | Nonobstructive azoospermia       | $3.49 \times 10^{-13}$ | 0                  | 21          |
|                  | Endocrine System Disorders, Gastrointestinal Disease, Metabolic Disease, Organismal Injury and Abnormalities                                   | Diabetes mellitus                | $9.57 \times 10^{-13}$ | -1.06              | 215         |
|                  | Cancer, Dermatological Diseases and Conditions, Organismal Injury and Abnormalities                                                            | Skin squamous cell carcinoma     | $5.5 \times 10^{-12}$  | 0                  | 159         |
|                  | Cancer, Organismal Injury and Abnormalities                                                                                                    | Melanoma                         | $3.44 \times 10^{-11}$ | 0.79               | 1119        |
|                  | Metabolic Disease, Organismal Injury and Abnormalities                                                                                         | Glucose metabolism disorder      | $2.09 \times 10^{-10}$ | -0.67              | 247         |
|                  | Cancer, Dermatological Diseases and Conditions, Organismal Injury and Abnormalities                                                            | Skin carcinoma                   | $1.05 \times 10^{-9}$  | 0                  | 229         |
|                  | Cell-To-Cell Signaling and Interaction                                                                                                         | Communication of cells           | $2.19 \times 10^{-9}$  | -1.66              | 217         |
|                  | Cardiovascular Disease, Organismal Injury and Abnormalities                                                                                    | Stenosis of artery               | $2.25 \times 10^{-9}$  | 0                  | 31          |
|                  | Organismal Injury and Abnormalities                                                                                                            | Discomfort                       | $3.23 \times 10^{-9}$  | -0.01              | 73          |
|                  | Cell-To-Cell Signaling and Interaction                                                                                                         | Signal transduction              | $4.42 \times 10^{-9}$  | 0                  | 199         |
|                  | Organismal Injury and Abnormalities                                                                                                            | Chronic pain                     | $7.71 \times 10^{-9}$  | 0                  | 31          |
|                  | Respiratory Disease                                                                                                                            | Chronic respiratory disorder     | $1.11 \times 10^{-8}$  | 0.37               | 55          |
|                  | Connective Tissue Disorders, Inflammatory Disease, Inflammatory Response, Organismal Injury and Abnormalities, Skeletal and Muscular Disorders | Osteoarthritis                   | $1.15 \times 10^{-8}$  | 0                  | 59          |
|                  | Psychological Disorders                                                                                                                        | Drug dependence                  | $2.11 \times 10^{-8}$  | 0                  | 36          |
|                  | Organismal Injury and Abnormalities                                                                                                            | Non-cancer pain                  | $2.91 \times 10^{-8}$  | 0                  | 38          |
|                  | Psychological Disorders                                                                                                                        | Alcoholism                       | $3.15 \times 10^{-8}$  | 0                  | 32          |
|                  | Cardiovascular Disease, Organismal Injury and Abnormalities                                                                                    | Vaso-occlusion                   | $3.78 \times 10^{-8}$  | 0.50               | 112         |
|                  | Cardiovascular Disease                                                                                                                         | Occlusion of blood vessel        | $4.49 \times 10^{-8}$  | 0.46               | 110         |

|                 |                                                                                                            |                                                       |                        |       |      |
|-----------------|------------------------------------------------------------------------------------------------------------|-------------------------------------------------------|------------------------|-------|------|
|                 | Gene Expression                                                                                            | Gene silencing                                        | $5.8 \times 10^{-08}$  | 0     | 25   |
|                 | Gastrointestinal Disease                                                                                   | Nausea                                                | $6.37 \times 10^{-08}$ | 0     | 26   |
|                 | Cardiovascular Disease, Organismal Injury and Abnormalities                                                | Stenosis of aorta                                     | $7.15 \times 10^{-08}$ | 0     | 24   |
|                 | Cancer, Organismal Injury and Abnormalities, Reproductive System Disease                                   | Early stage invasive cervical squamous cell carcinoma | $8.41 \times 10^{-08}$ | 0     | 11   |
|                 | Cardiovascular Disease, Organismal Injury and Abnormalities                                                | Infarction of heart                                   | $1.16 \times 10^{-07}$ | -2.23 | 56   |
|                 | Cardiovascular Disease, Organismal Injury and Abnormalities                                                | Occlusion of artery                                   | $1.21 \times 10^{-07}$ | 0.10  | 107  |
|                 | Neurological Disease, Psychological Disorders                                                              | Mania                                                 | $1.7 \times 10^{-07}$  | 0     | 18   |
|                 | Developmental Disorder, Hereditary Disorder, Ophthalmic Disease, Organismal Injury and Abnormalities       | Recessive congenital stationary night blindness       | $1.94 \times 10^{-07}$ | 0     | 8    |
|                 | Cell-To-Cell Signaling and Interaction, Nervous System Development and Function                            | Action potential of cells                             | $2.08 \times 10^{-07}$ | 0.60  | 39   |
|                 | Organismal Injury and Abnormalities                                                                        | Backache                                              | $2.37 \times 10^{-07}$ | 0     | 23   |
|                 | Cardiovascular Disease, Neurological Disease, Organismal Injury and Abnormalities, Psychological Disorders | Vascular dementia                                     | $2.78 \times 10^{-07}$ | 0     | 17   |
|                 | Cardiovascular Disease, Organismal Injury and Abnormalities, Skeletal and Muscular Disorders               | Myocardial infarction                                 | $2.9 \times 10^{-07}$  | -1.80 | 54   |
|                 | Cardiovascular Disease, Organismal Injury and Abnormalities                                                | Acute coronary syndrome                               | $3.2 \times 10^{-07}$  | 0     | 40   |
|                 | Gastrointestinal Disease                                                                                   | Vomiting                                              | $3.63 \times 10^{-07}$ | 0     | 27   |
|                 | Cardiovascular Disease, Organismal Injury and Abnormalities                                                | Ischemia of heart                                     | $3.71 \times 10^{-07}$ | 0     | 46   |
|                 | Developmental Disorder, Hereditary Disorder, Ophthalmic Disease, Organismal Injury and Abnormalities       | Congenital stationary night blindness                 | $4.27 \times 10^{-07}$ | 0     | 9    |
|                 | Neurological Disease, Organismal Injury and Abnormalities                                                  | Subarachnoid hemorrhage                               | $4.35 \times 10^{-07}$ | 0     | 20   |
|                 | Cell-To-Cell Signaling and Interaction                                                                     | Activation of cells                                   | $4.73 \times 10^{-07}$ | 0.04  | 183  |
|                 | Cardiovascular Disease, Organismal Injury and Abnormalities                                                | Infarction                                            | $5.89 \times 10^{-07}$ | -1.96 | 80   |
|                 | Cardiovascular Disease, Organismal Injury and Abnormalities                                                | Disorder of coronary artery                           | $6.36 \times 10^{-07}$ | 1.97  | 65   |
| <b>6(OH)Mel</b> | Cell Signaling, Molecular Transport, Vitamin and Mineral Metabolism                                        | Mobilization of $\text{Ca}^{2+}$                      | $7.55 \times 10^{-07}$ | 0.66  | 66   |
|                 | Inflammatory Response, Respiratory Disease                                                                 | Inflammation of respiratory system component          | $8.61 \times 10^{-07}$ | -0.30 | 118  |
|                 | Cancer, Dermatological Diseases and Conditions, Organismal Injury and Abnormalities                        | Cutaneous melanoma                                    | $8.62 \times 10^{-21}$ | 0     | 1012 |
|                 | Cancer, Dermatological Diseases and Conditions, Organismal Injury and Abnormalities                        | Skin cancer                                           | $1.07 \times 10^{-17}$ | 1.17  | 1042 |
|                 | Dermatological Diseases and Conditions, Organismal Injury and Abnormalities                                | Skin lesion                                           | $2.37 \times 10^{-17}$ | -0.53 | 1052 |
|                 | Cancer, Dermatological Diseases and Conditions, Organismal Injury and Abnormalities                        | Skin tumor                                            | $3.04 \times 10^{-17}$ | 0.84  | 1045 |

|                                                                                                                                     |                                     |                        |       |      |
|-------------------------------------------------------------------------------------------------------------------------------------|-------------------------------------|------------------------|-------|------|
| Cancer, Dermatological Diseases and Conditions, Organismal Injury and Abnormalities                                                 | Skin squamous cell carcinoma        | $1.46 \times 10^{-14}$ | 0     | 167  |
| Cancer, Dermatological Diseases and Conditions, Organismal Injury and Abnormalities                                                 | Non-melanoma skin cancer            | $2.15 \times 10^{-14}$ | 0     | 169  |
| Cancer, Organismal Injury and Abnormalities                                                                                         | Melanoma                            | $1.49 \times 10^{-12}$ | 0.28  | 1125 |
| Cancer, Dermatological Diseases and Conditions, Organismal Injury and Abnormalities                                                 | Skin carcinoma                      | $3.69 \times 10^{-11}$ | 0     | 235  |
| Molecular Transport                                                                                                                 | Quantity of metal                   | $3.08 \times 10^{-10}$ | 1.88  | 109  |
| Molecular Transport                                                                                                                 | Quantity of metal ion               | $3.11 \times 10^{-10}$ | 1.95  | 98   |
| Organismal Injury and Abnormalities                                                                                                 | Discomfort                          | $4.77 \times 10^{-10}$ | -0.41 | 75   |
| Cell-To-Cell Signaling and Interaction                                                                                              | Communication of cells              | $1.71 \times 10^{-09}$ | -0.46 | 217  |
| Organismal Injury and Abnormalities, Reproductive System Disease                                                                    | Nonobstructive azoospermia          | $6.37 \times 10^{-09}$ | 0     | 17   |
| Cell-To-Cell Signaling and Interaction                                                                                              | Signal transduction                 | $9.67 \times 10^{-09}$ | 0     | 197  |
| Cell Signaling, Molecular Transport, Vitamin and Mineral Metabolism                                                                 | Quantity of $\text{Ca}^{2+}$        | $1.23 \times 10^{-08}$ | 1.25  | 85   |
| Molecular Transport                                                                                                                 | Transport of ion                    | $1.87 \times 10^{-08}$ | 0.66  | 113  |
| Molecular Transport                                                                                                                 | Transport of cation                 | $2.58 \times 10^{-08}$ | 0.69  | 86   |
| Cell-To-Cell Signaling and Interaction, Nervous System Development and Function                                                     | Neurotransmission                   | $2.67 \times 10^{-08}$ | 0.81  | 93   |
| Organismal Injury and Abnormalities, Psychological Disorders                                                                        | Anxiety Disorders                   | $4.25 \times 10^{-08}$ | 0     | 35   |
| Endocrine System Disorders, Gastrointestinal Disease, Metabolic Disease, Organismal Injury and Abnormalities                        | Diabetes mellitus                   | $6.1 \times 10^{-08}$  | -1.64 | 194  |
| Psychological Disorders                                                                                                             | Alcoholism                          | $1.09 \times 10^{-07}$ | 0     | 31   |
| Endocrine System Disorders, Gastrointestinal Disease, Immunological Disease, Metabolic Disease, Organismal Injury and Abnormalities | Insulin-dependent diabetes mellitus | $1.6 \times 10^{-07}$  | -1.89 | 86   |
| Cardiovascular Disease, Neurological Disease, Organismal Injury and Abnormalities                                                   | Stroke                              | $2.03 \times 10^{-07}$ | 1.09  | 58   |
| Psychological Disorders                                                                                                             | Drug dependence                     | $2.23 \times 10^{-07}$ | 0     | 34   |
| Cell Morphology, Cellular Function and Maintenance                                                                                  | Depolarization of cells             | $2.51 \times 10^{-07}$ | -2.63 | 18   |
| Nucleic Acid Metabolism, Small Molecule Biochemistry                                                                                | Biosynthesis of cyclic nucleotides  | $2.91 \times 10^{-07}$ | 0.92  | 46   |
| Cardiovascular Disease, Organismal Injury and Abnormalities                                                                         | Stenosis of aorta                   | $3.1 \times 10^{-07}$  | 0     | 23   |
| Cellular Function and Maintenance                                                                                                   | Ion homeostasis of cells            | $3.82 \times 10^{-07}$ | -0.51 | 116  |
| Cardiovascular Disease, Organismal Injury and Abnormalities                                                                         | Stenosis of artery                  | $5.74 \times 10^{-07}$ | 0     | 27   |
| Behavior                                                                                                                            | Emotional behavior                  | $6.13 \times 10^{-07}$ | 0.92  | 64   |
| Organismal Injury and Abnormalities                                                                                                 | Non-cancer pain                     | $8.32 \times 10^{-07}$ | 0     | 35   |
| Molecular Transport                                                                                                                 | Transport of inorganic cation       | $1.03 \times 10^{-06}$ | 0.02  | 74   |

|      |                                                                                                                                    |                                                  |                        |       |      |
|------|------------------------------------------------------------------------------------------------------------------------------------|--------------------------------------------------|------------------------|-------|------|
|      | Respiratory Disease                                                                                                                | Sleep disordered breathing                       | $1.76 \times 10^{-06}$ | 0     | 24   |
|      | Metabolic Disease, Organismal Injury and Abnormalities                                                                             | Glucose metabolism disorder                      | $2.57 \times 10^{-06}$ | -1.97 | 225  |
|      | Organismal Injury and Abnormalities                                                                                                | Progressive fibrosis                             | $2.67 \times 10^{-06}$ | 0     | 10   |
|      | Connective Tissue Disorders, Organismal Injury and Abnormalities, Respiratory Disease                                              | Progressive interstitial lung disease            | $2.67 \times 10^{-06}$ | 0     | 10   |
|      | Cellular Function and Maintenance, Molecular Transport                                                                             | Flux of ion                                      | $2.75 \times 10^{-06}$ | -0.41 | 68   |
|      | Connective Tissue Disorders, Inflammatory Disease, Inflammatory Response, Organismal Injury and Abnormalities, Respiratory Disease | Slowly progressive idiopathic pulmonary fibrosis | $2.83 \times 10^{-06}$ | 0     | 8    |
|      | Cardiovascular Disease, Organismal Injury and Abnormalities                                                                        | Aortic occlusive disease                         | $3.35 \times 10^{-06}$ | -1.38 | 30   |
|      | Cell Signaling, Nucleic Acid Metabolism, Small Molecule Biochemistry                                                               | Synthesis of cyclic AMP                          | $3.69 \times 10^{-06}$ | 1.64  | 40   |
|      | Cellular Function and Maintenance, Molecular Transport                                                                             | Flux of cation                                   | $3.83 \times 10^{-06}$ | -0.79 | 65   |
|      | Cell-To-Cell Signaling and Interaction, Nervous System Development and Function                                                    | Action potential of cells                        | $4.32 \times 10^{-06}$ | 0.11  | 36   |
|      | Gastrointestinal Disease                                                                                                           | Vomiting                                         | $4.44 \times 10^{-06}$ | 0     | 25   |
|      | Cellular Function and Maintenance, Molecular Transport                                                                             | Flux of inorganic cation                         | $4.59 \times 10^{-06}$ | -0.89 | 64   |
|      |                                                                                                                                    |                                                  |                        |       |      |
| AFMK | Cancer, Dermatological Diseases and Conditions, Organismal Injury and Abnormalities                                                | Cutaneous melanoma                               | $2.06 \times 10^{-23}$ | 0     | 1059 |
|      | Dermatological Diseases and Conditions, Organismal Injury and Abnormalities                                                        | Skin lesion                                      | $8.72 \times 10^{-22}$ | 0.20  | 1111 |
|      | Cancer, Dermatological Diseases and Conditions, Organismal Injury and Abnormalities                                                | Skin tumor                                       | $1.03 \times 10^{-21}$ | 0.46  | 1104 |
|      | Cancer, Dermatological Diseases and Conditions, Organismal Injury and Abnormalities                                                | Skin cancer                                      | $1.24 \times 10^{-21}$ | -0.15 | 1098 |
|      | Cancer, Dermatological Diseases and Conditions, Organismal Injury and Abnormalities                                                | Skin squamous cell carcinoma                     | $5.19 \times 10^{-16}$ | 0     | 176  |
|      | Cancer, Organismal Injury and Abnormalities                                                                                        | Melanoma                                         | $9.45 \times 10^{-16}$ | 1.09  | 1184 |
|      | Cancer, Dermatological Diseases and Conditions, Organismal Injury and Abnormalities                                                | Skin carcinoma                                   | $4.42 \times 10^{-15}$ | 0     | 258  |
|      | Endocrine System Disorders, Gastrointestinal Disease, Metabolic Disease, Organismal Injury and Abnormalities                       | Diabetes mellitus                                | $1.56 \times 10^{-12}$ | -1.24 | 220  |
|      | Metabolic Disease, Organismal Injury and Abnormalities                                                                             | Glucose metabolism disorder                      | $4.72 \times 10^{-11}$ | -0.78 | 257  |
|      | Organismal Injury and Abnormalities, Reproductive System Disease                                                                   | Nonobstructive azoospermia                       | $1.13 \times 10^{-10}$ | 0     | 19   |
|      | Molecular Transport                                                                                                                | Transport of ion                                 | $7.72 \times 10^{-10}$ | -0.21 | 121  |
|      | Cellular Function and Maintenance                                                                                                  | Ion homeostasis of cells                         | $1.06 \times 10^{-09}$ | -0.15 | 129  |
|      | Organismal Injury and Abnormalities                                                                                                | Discomfort                                       | $2.56 \times 10^{-09}$ | -0.43 | 75   |
|      | Molecular Transport                                                                                                                | Transport of cation                              | $3.46 \times 10^{-09}$ | -0.27 | 91   |
|      |                                                                                                                                    |                                                  |                        |       |      |

|  |                                                                                                                  |                                                       |                        |       |     |
|--|------------------------------------------------------------------------------------------------------------------|-------------------------------------------------------|------------------------|-------|-----|
|  | Respiratory Disease                                                                                              | Chronic respiratory disorder                          | $1.4 \times 10^{-08}$  | 1.35  | 56  |
|  | Organismal Injury and Abnormalities, Respiratory Disease                                                         | Chronic obstructive pulmonary disease                 | $2.06 \times 10^{-08}$ | 1.35  | 48  |
|  | Molecular Transport                                                                                              | Transport of $K^+$                                    | $5.21 \times 10^{-08}$ | -0.15 | 30  |
|  | Molecular Transport                                                                                              | Transport of inorganic cation                         | $1.26 \times 10^{-07}$ | -0.59 | 79  |
|  | Cellular Function and Maintenance, Molecular Transport                                                           | Flux of ion                                           | $1.38 \times 10^{-07}$ | 0.007 | 74  |
|  | Cellular Function and Maintenance, Molecular Transport                                                           | Flux of inorganic cation                              | $2.04 \times 10^{-07}$ | -0.53 | 70  |
|  | Cell Signaling, Molecular Transport, Vitamin and Mineral Metabolism                                              | Mobilization of $Ca^{2+}$                             | $2.71 \times 10^{-07}$ | -0.27 | 69  |
|  | Molecular Transport                                                                                              | Transport of monovalent inorganic cation              | $4.09 \times 10^{-07}$ | -0.15 | 49  |
|  | Nervous System Development and Function                                                                          | Olfactory response                                    | $4.41 \times 10^{-07}$ | 0     | 18  |
|  | Cellular Movement, Hematological System Development and Function, Immune Cell Trafficking, Inflammatory Response | Chemotaxis of antigen presenting cells                | $4.56 \times 10^{-07}$ | 0.28  | 40  |
|  | Inflammatory Response, Respiratory Disease                                                                       | Inflammation of respiratory system component          | $5.71 \times 10^{-07}$ | -0.35 | 122 |
|  | Molecular Transport                                                                                              | Transport of metal ion                                | $6.42 \times 10^{-07}$ | -0.37 | 71  |
|  | Nervous System Development and Function                                                                          | Olfaction                                             | $6.58 \times 10^{-07}$ | -0.43 | 24  |
|  | Molecular Transport                                                                                              | Quantity of metal                                     | $9.31 \times 10^{-07}$ | -0.54 | 100 |
|  | Molecular Transport                                                                                              | Quantity of metal ion                                 | $1.16 \times 10^{-06}$ | -0.34 | 89  |
|  | Cellular Movement, Hematological System Development and Function, Immune Cell Trafficking, Inflammatory Response | Chemotaxis of phagocytes                              | $1.43 \times 10^{-06}$ | -0.14 | 66  |
|  | Inflammatory Response, Organismal Injury and Abnormalities                                                       | Inflammation of organ                                 | $1.56 \times 10^{-06}$ | -0.04 | 247 |
|  | Cancer, Organismal Injury and Abnormalities, Reproductive System Disease                                         | Early stage invasive cervical squamous cell carcinoma | $1.73 \times 10^{-06}$ | 0     | 10  |
|  | Inflammatory Response                                                                                            | Inflammation of body cavity                           | $1.92 \times 10^{-06}$ | -0.25 | 186 |
|  | Gene Expression                                                                                                  | Gene silencing                                        | $1.96 \times 10^{-06}$ | 0     | 23  |
|  | Cell Signaling, Cellular Function and Maintenance, Molecular Transport, Vitamin and Mineral Metabolism           | Flux of $Ca^{2+}$                                     | $1.97 \times 10^{-06}$ | -0.27 | 64  |
|  | Cardiovascular Disease, Organismal Injury and Abnormalities                                                      | Ischemia of heart                                     | $2.45 \times 10^{-06}$ | 0     | 45  |
|  | Connective Tissue Disorders, Organismal Injury and Abnormalities, Respiratory Disease                            | Progressive interstitial lung disease                 | $3.76 \times 10^{-06}$ | 0     | 10  |

|  |                                                                                                                                    |                                                  |                        |       |     |
|--|------------------------------------------------------------------------------------------------------------------------------------|--------------------------------------------------|------------------------|-------|-----|
|  | Connective Tissue Disorders, Inflammatory Disease, Inflammatory Response, Organismal Injury and Abnormalities, Respiratory Disease | Slowly progressive idiopathic pulmonary fibrosis | $3.76 \times 10^{-06}$ | 0     | 8   |
|  | Organismal Injury and Abnormalities                                                                                                | Stenosis of vasculature                          | $3.92 \times 10^{-06}$ | 0.93  | 27  |
|  | Inflammatory Response                                                                                                              | Inflammation of absolute anatomical region       | $3.94 \times 10^{-06}$ | -0.66 | 211 |
|  | Cardiovascular Disease, Organismal Injury and Abnormalities                                                                        | Vaso-occlusion                                   | $3.96 \times 10^{-06}$ | 0.26  | 107 |
|  | Cell-To-Cell Signaling and Interaction                                                                                             | Communication of cells                           | $4.11 \times 10^{-06}$ | -0.65 | 206 |
|  | Cardiovascular Disease, Organismal Injury and Abnormalities                                                                        | Stenosis of artery                               | $4.12 \times 10^{-06}$ | 1.40  | 26  |
|  | Inflammatory Disease, Inflammatory Response, Organismal Injury and Abnormalities, Respiratory Disease                              | Inflammation of lung                             | $4.28 \times 10^{-06}$ | -0.43 | 86  |

- **Supplementary Figures**

**Supplementary Figure 1.** Volcano Plot diagram of differentially expressed genes for melatonin vs EtOH (A), 6-hydroxymelatonin vs EtOH (B), and AFMK vs EtOH (C).

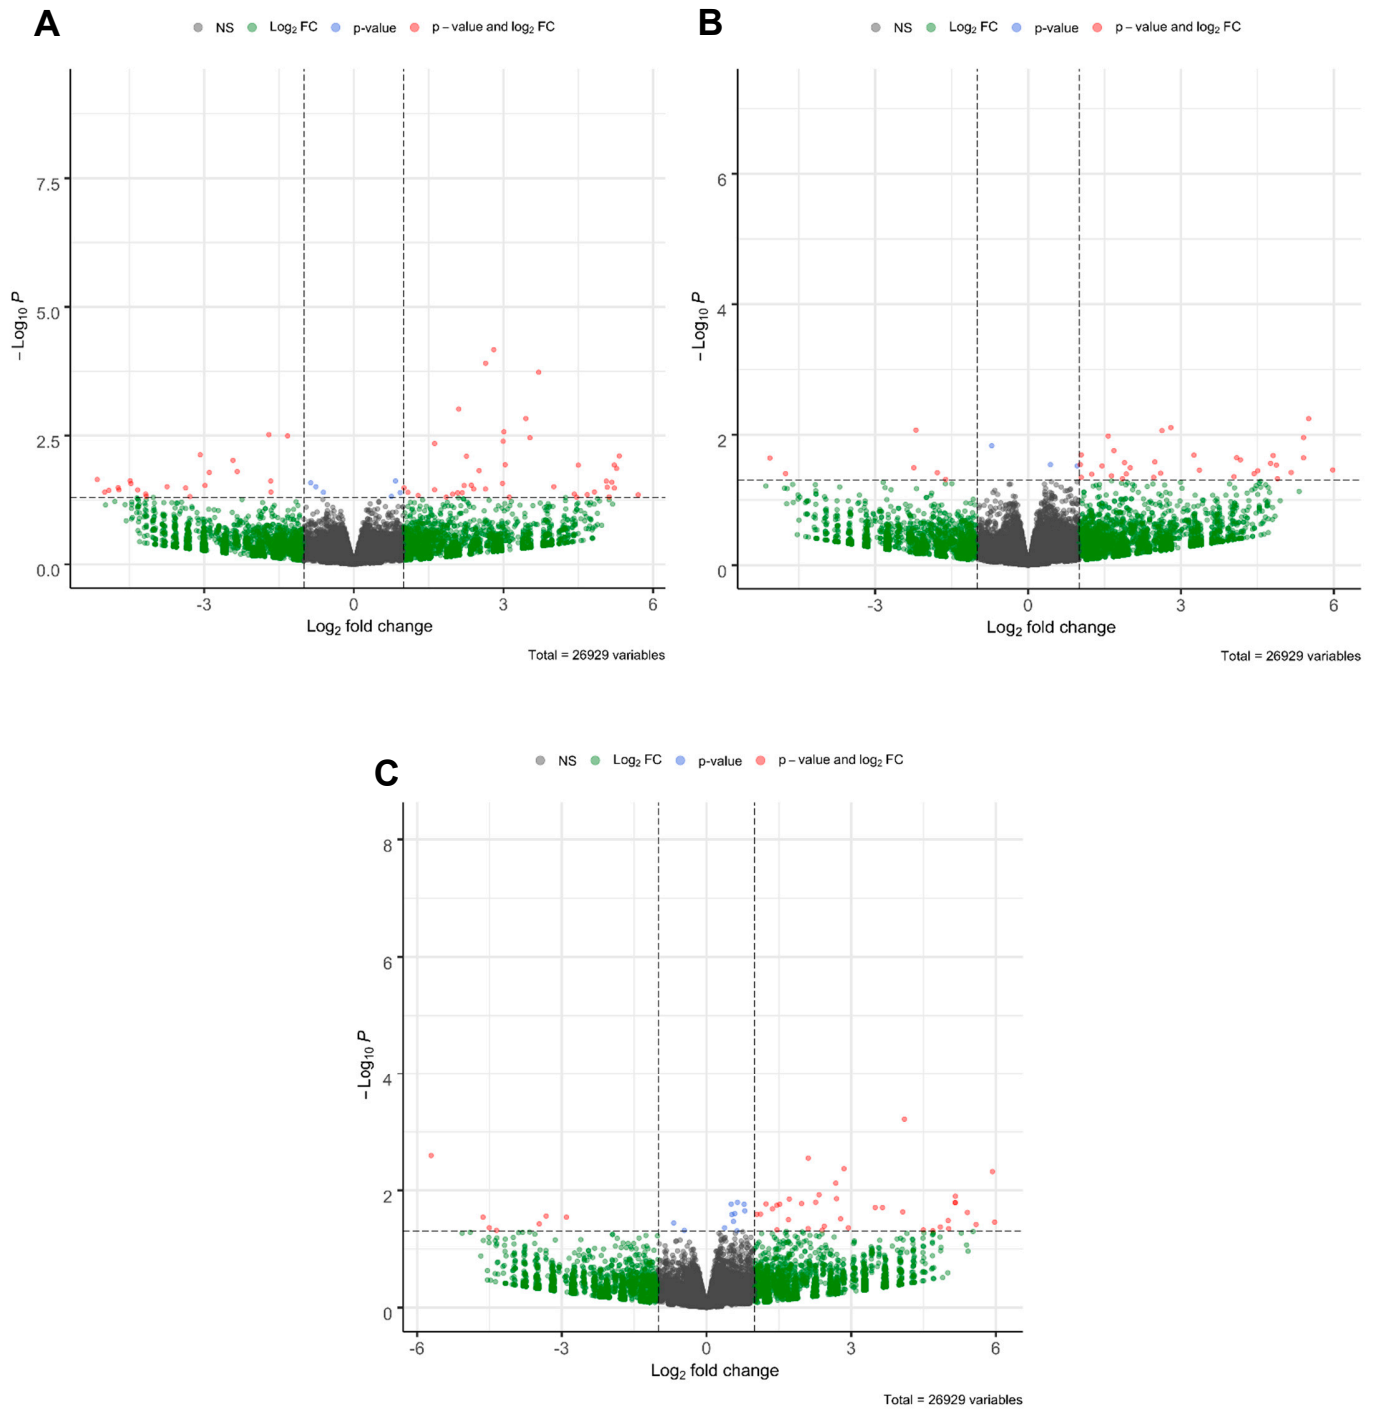

Supplement: s1 [file s1]
